# Supplementary material
Source: Springer Nature journal article supplement (https://www.springermedizin.de/resource/supplementary/13256_2011_1707_MOESM4_ESM.pdf/9648290)

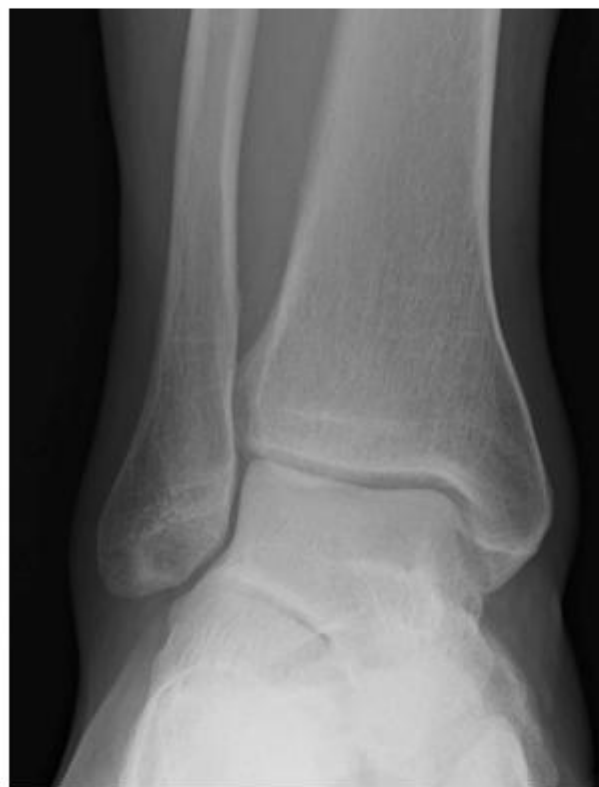

R

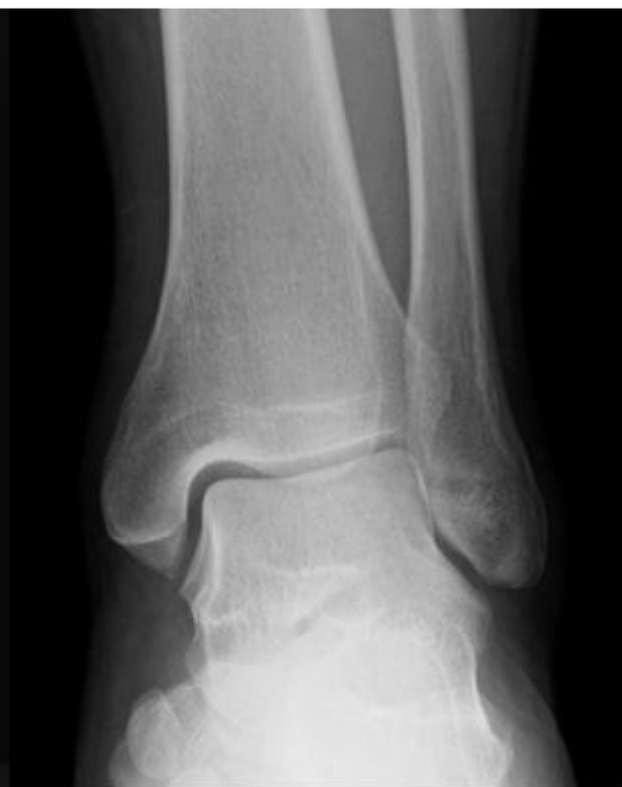

L

Supplement: MOESM4 [file 9648290]
